# Supplementary material
Source: Springer Nature journal article supplement (https://www.springermedizin.de/resource/supplementary/13032_2013_73_MOESM1_ESM.pdf/9651602)
Supplement: MOESM1 [file 9651602]

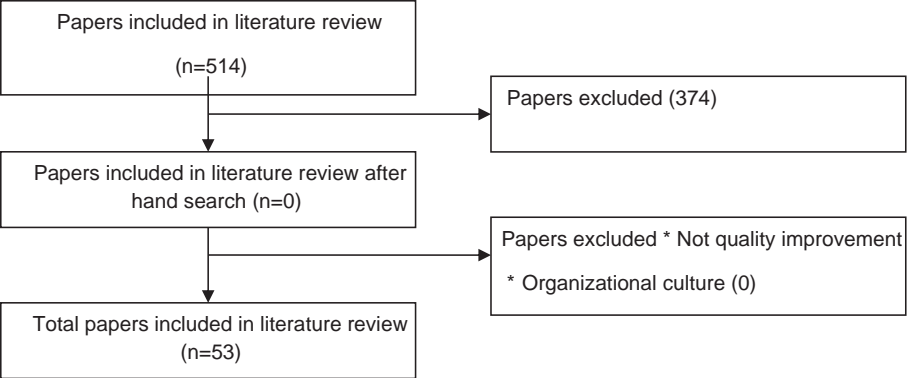

| <b>*Excluded</b>                     | <b>n</b> |
|--------------------------------------|----------|
| 1. Not culture related               | 158      |
| 2. ICU practice culture              | 40       |
| 3. Other discipline practice culture | 76       |
| 4. Neonatal                          | 2        |
| 5. Paediatric                        | 11       |
| 6. Editorial /other                  | 87       |
